# Supplementary material for: The impact of levamisole and alcohol on white matter microstructure in adult chronic cocaine users
Source: PubMed Central journal article supplement — Addict Biol. 2022 Mar 2;27(3):e13149. doi: 10.1111/adb.13149 (PMC9287079; doi:10.1111/adb.13149), 2022-03-02

$p < 0.001$

Right posterior limb  
of internal capsule

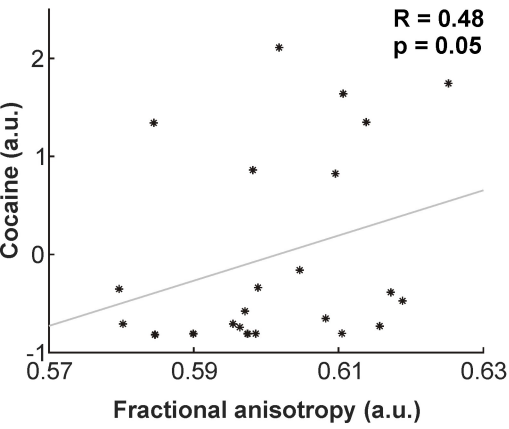

Right posterior limb  
of internal capsule

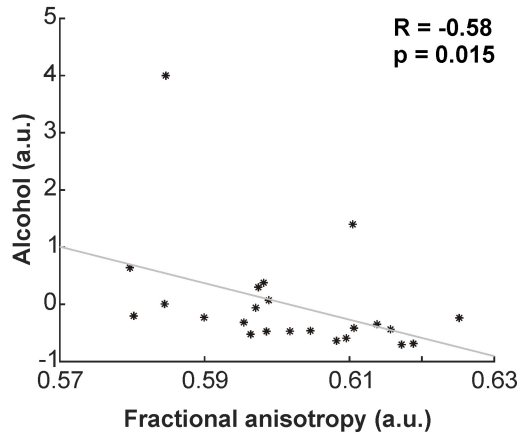

$p < 0.001$

Right posterior limb  
of internal capsule

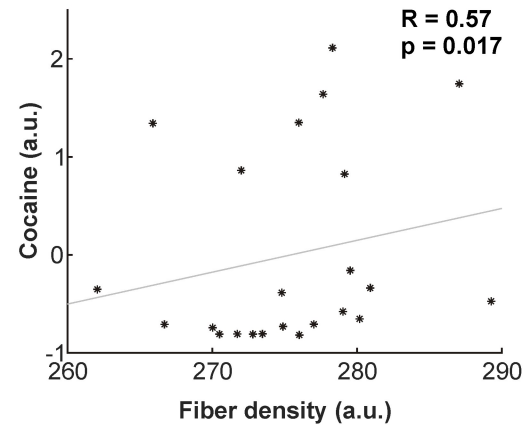

Right posterior limb  
of internal capsule

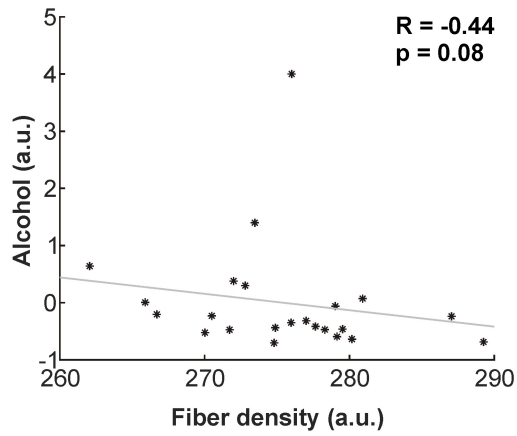

$p = 0.037$

Right cingulate gyrus

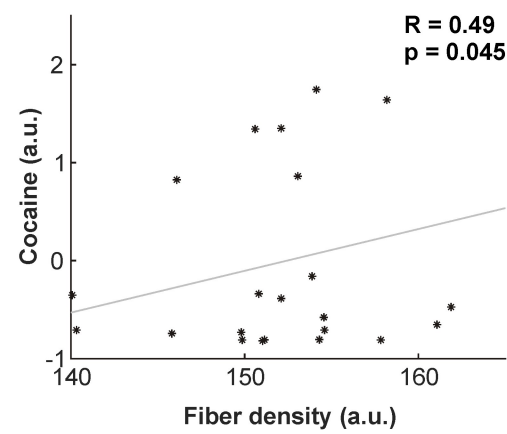

Right cingulate gyrus

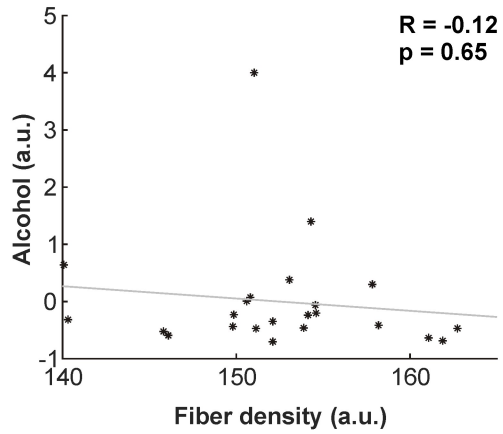

$p = 0.048$

Left superior  
fronto-occipital fasciculus

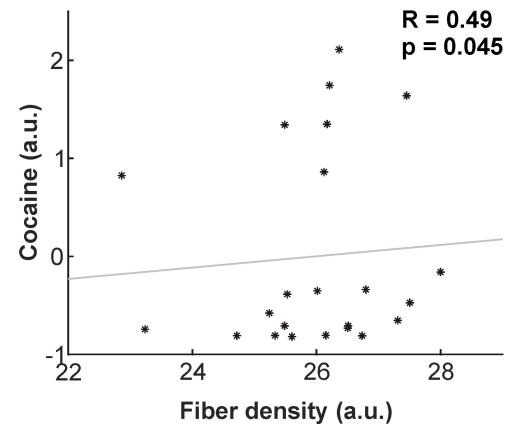

Left superior  
fronto-occipital fasciculus

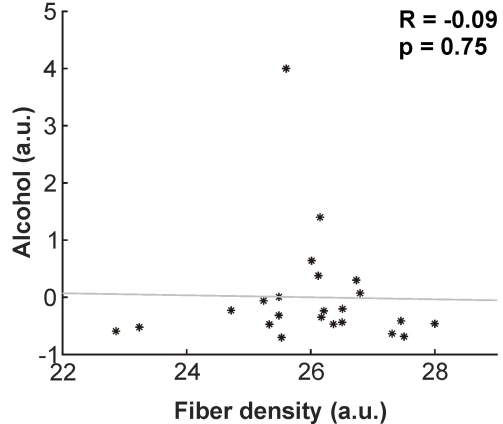

Supplement: ADB-27-0-s001.pdf [file ADB-27-0-s001.pdf]
