# Supplementary figures and images for: The impact of levamisole and alcohol on white matter microstructure in adult chronic cocaine users
Source: PubMed Central journal article supplement — Addict Biol. 2022 Mar 2;27(3):e13149. doi: 10.1111/adb.13149 (PMC9287079; doi:10.1111/adb.13149), 2022-03-02

p < 0.001

p = 0.003

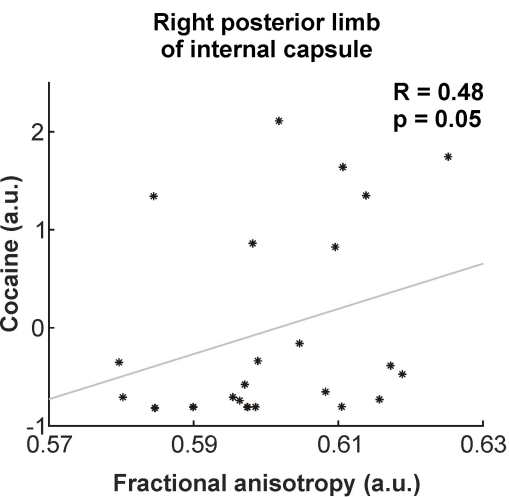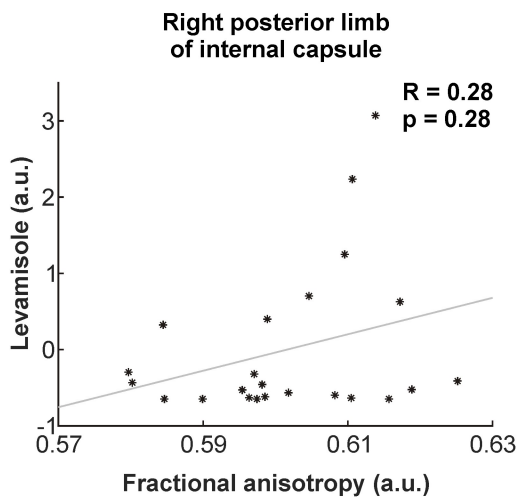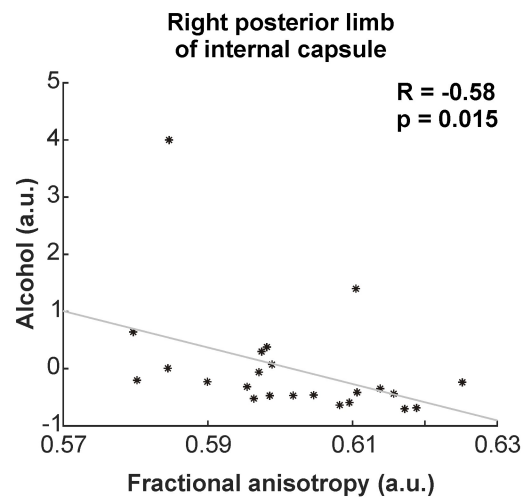

p = 0.004

p = 0.006

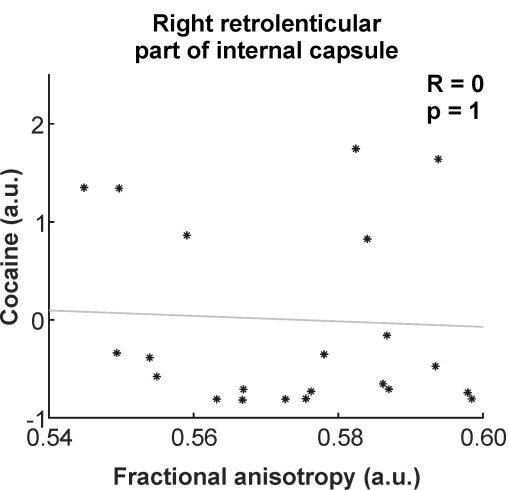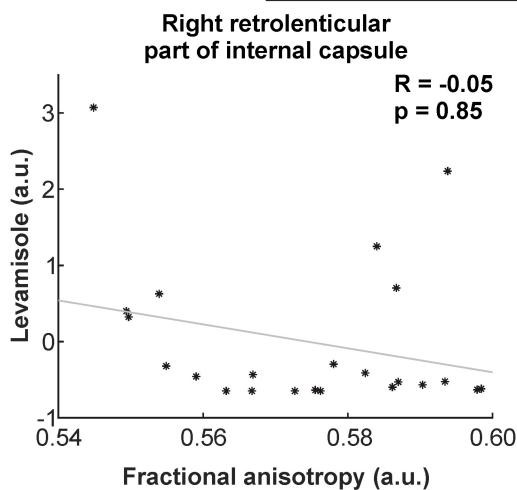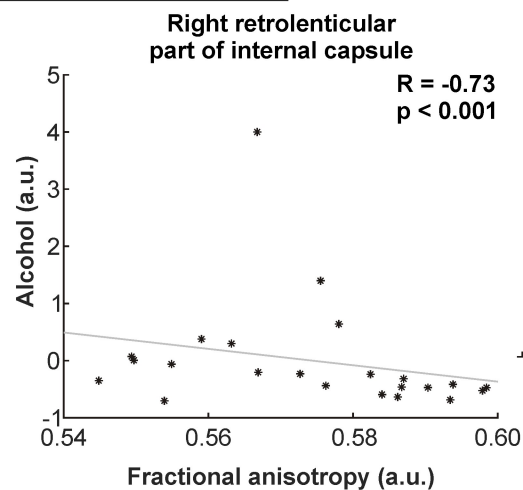

p = 0.009

p = 0.029

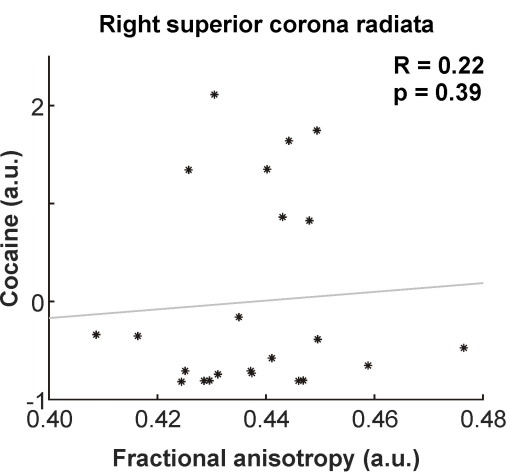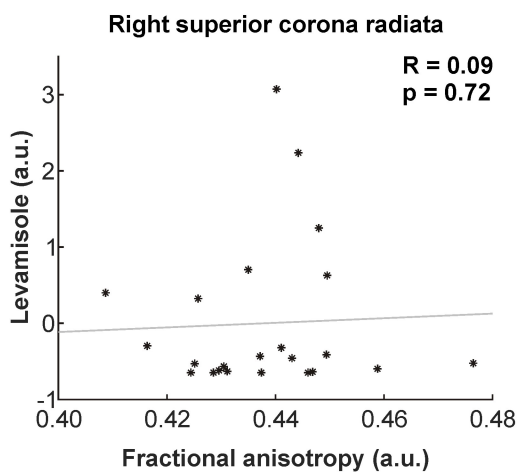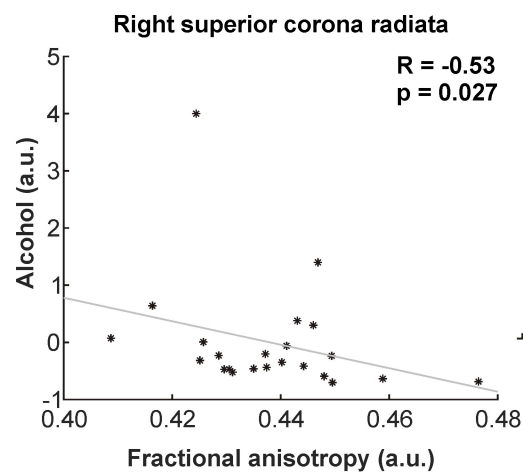

p < 0.001

p = 0.002

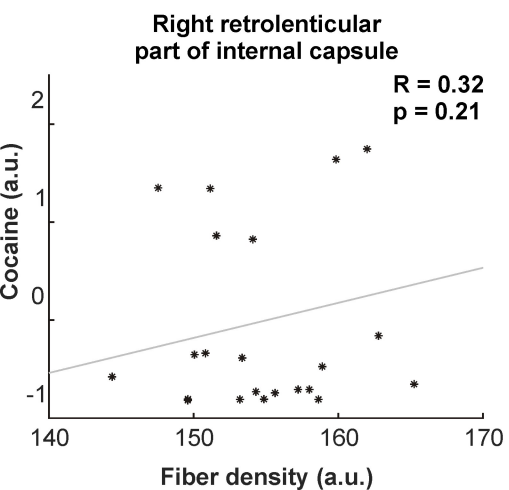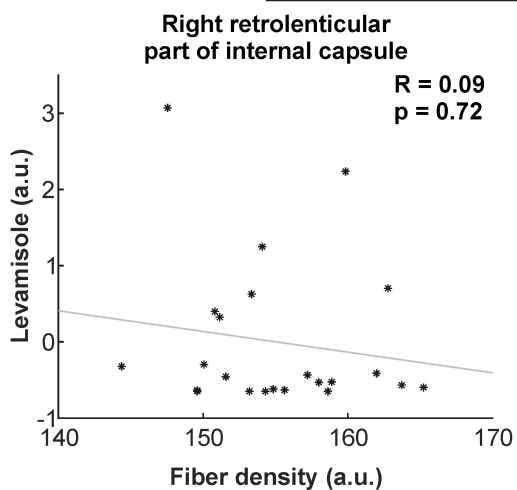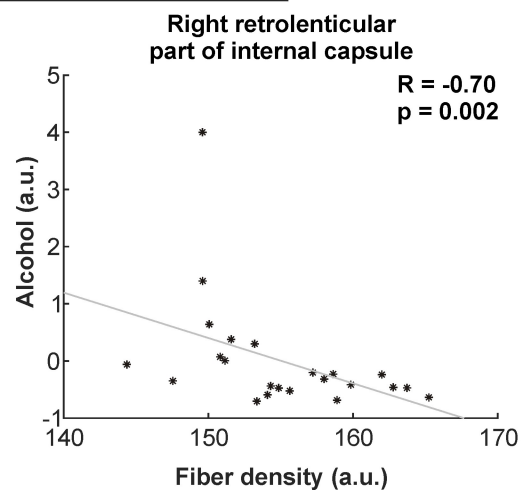

Supplement: ADB-27-0-s002.pdf [file ADB-27-0-s002.pdf]

$p = 0.006$

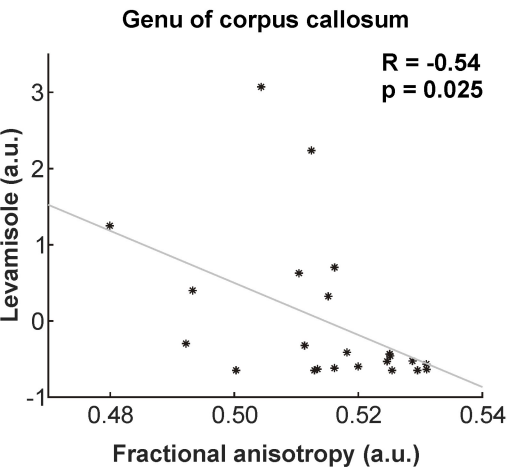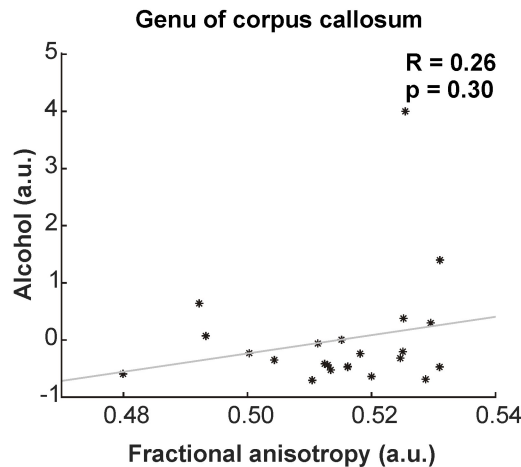

$p = 0.005$

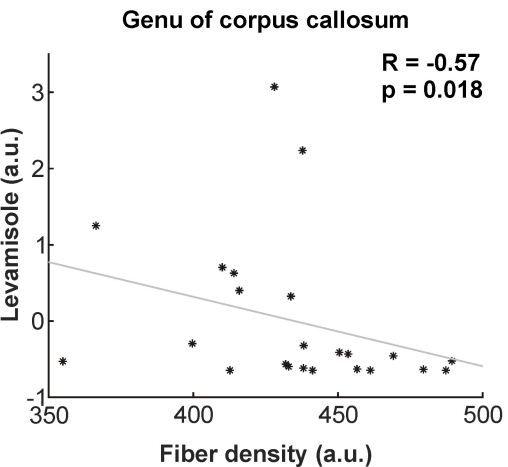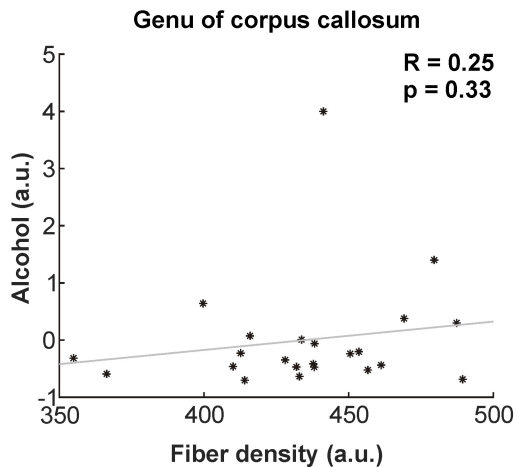

Supplement: ADB-27-0-s003.pdf [file ADB-27-0-s003.pdf]
